# Supplementary material for: An iron phosphate hydroxide hydrate electrocatalyst: synergistic effects of Fe2+ and Fe3+ for enhanced hydrogen evolution reaction stability
Source: Royal Society of Chemistry journal article supplement (doi:10.1039/d3se01488f), 2023-12-11
Supplement: d3se01488f1.pdf [file d3se01488f1.pdf]

# **Iron Phosphate Hydroxide Hydrate Electrocatalyst: Synergistic Effects of Fe<sup>2+</sup> and Fe<sup>3+</sup> for Enhanced Hydrogen Evolution Reaction Stability**

*Jeygeerthika Reddy<sup>a</sup>, Vivekanandan Raman<sup>b</sup>, K.K.Viswanathan<sup>c</sup>, Kandasamy Prabakar<sup>a \*</sup>*

<sup>a</sup> Department of Electrical and Electronics Engineering, Pusan National University, 2

Busandaehak-ro 63beon-gil, Geumjeong-gu, Busan-46241, Republic of Korea.

<sup>b</sup> School of Advanced Materials Science and Engineering, Sungkyunkwan University, Suwon,

South Korea.

<sup>c</sup> Department of Mathematical Modeling, Faculty of Mathematics, Samarkand State University,

Samarkand, 140104, Uzbekistan.

*\*Corresponding author*

E-mail: [prabakar@pusan.ac.kr](mailto:prabakar@pusan.ac.kr)

## Electrochemical Measurements:

At room temperature in a 1M KOH electrolyte solution, the SP-150 biologic machine was used for all electrochemical experiments. The electrolyte solution was purged with N<sub>2</sub> gas to eliminate any undissolved gases before each electrochemical experiment. Before measuring the OER and HER tests, the electrode was activated using cyclic voltammetry (CV) in a three-electrode setup at a scan rate of 50 mV/s for 200 cycles. The working, counter, and reference electrodes are catalyst-grown NF, graphite rod, and Hg/HgO (1M KOH), respectively. The working electrode's geometrical area was maintained at 1 cm x 1 cm. The linear sweep voltammetry (LSV) of HER was studied at a scan rate of 1 mV/s with 85% iR correction. The observed potentials ( $E_{\text{Hg/HgO}}$ ) were converted to reversible hydrogen electrode ( $E_{\text{RHE}}$ ) values using the Nernst Equation (1)

$$E_{\text{RHE}} = E_{\text{Hg/HgO}} + (0.0591 * \text{pH}) + 0.098 \text{ V.} \quad (1)$$

the pH value of the 1M KOH electrolyte is 14.

The Tafel slopes were calculated from the LSV using plots of overpotentials ( $\eta$ ) vs.  $\log j$  using Equation (2).

$$\eta = b \log j + a \quad (2)$$

where,  $b$  is the Tafel slope,  $j$  is the current density, and 'a' is constant.

The step chronopotentiometry (CP) was performed at various current densities ranging from 10 to 100 mA/cm<sup>2</sup>. Electrochemical impedance spectroscopy (EIS) was measured in the frequency ranges of 0.04 Hz to 10 kHz for HER. The EIS curves were fitted with a corresponding equivalent circuit using Z-fit analysis. The electric double-layer capacitance ( $C_{\text{dl}}$ ) was calculated from CV runs in the non-faradic region ranging from -0.3 to -0.6 (V vs. Hg/HgO) at different scan rates ranging from 10 to 100 mV s<sup>-1</sup>. The difference in anodic and cathodic current density ( $\Delta j = j_{\text{a}} - j_{\text{c}}$ )

vs. the scan rate ( $v$ ) yields a straight line, and the slope of this straight line gives  $2C_{dl}$  value (Equation (3)).

$$\Delta j = v \cdot 2 \cdot C_{dl} \quad (3)$$

The  $C_{dl}$  obtained can be further used to find ECSA, from Equation (4)

$$ECSA = \frac{C_{dl}}{C_s} \quad (4)$$

$C_s$  was calculated from galvanostatic charging-discharging characteristics (Equation (5)):

$$C_s = \frac{I \Delta t}{m \Delta V} \quad (5)$$

Where  $I$  – current density ( $\text{mA cm}^{-2}$ ),  $\Delta t$  – discharging time (s),  $m$  – mass loading of the catalyst (mg)

$\Delta V$  – potential window (V)

The electrochemically exposed active sites were estimated from the CV swept in the non-Faradic region at 50 mV/s in a 1 M KOH electrolyte using Equation (6)

$$C = \frac{\int \text{area of reduction peak/scan rate}}{\text{Charge of one electron}} \quad (6)$$

The turnover frequency (TOF) was calculated from Equation (7)

$$TOF = \frac{N_A}{j \cdot n \cdot F \cdot C} \text{ s}^{-1} \quad (7)$$

where,  $j$  = Current density ( $\text{mA cm}^{-2}$ )

$N_A$  = Avogadro number ( $6.02214 \times 10^{23} \text{ mol}^{-1}$ )

$F$  = Faraday's constant ( $96485 \text{ C mol}^{-1}$ )

n = Number of electrons transferred (For HER = 2)

C = Surface concentration of active sites

The electrocatalyst's long-term stability was tested for 80 hours by the CP technique at a high current density of 100 mA cm<sup>-2</sup>.

**Table S1** : Atomic percentage of Fe and P from EDS and Fe<sup>3+</sup>/Fe<sup>2+</sup> ratio of all the samples from the XPS spectra

| <b>Samples</b> | <b>Fe%</b> | <b>P%</b> | <b>Fe<sup>3+</sup>/Fe<sup>2+</sup></b> |
|----------------|------------|-----------|----------------------------------------|
| FPOH-1         | 10         | 90        | 1.12                                   |
| FPOH-2         | 20         | 80        | 3.30                                   |
| FPOH-3         | 25         | 75        | 1.36                                   |
| FPOH-4         | 40         | 60        | 1.24                                   |
| FPOH-5         | 54         | 46        | 1.6                                    |

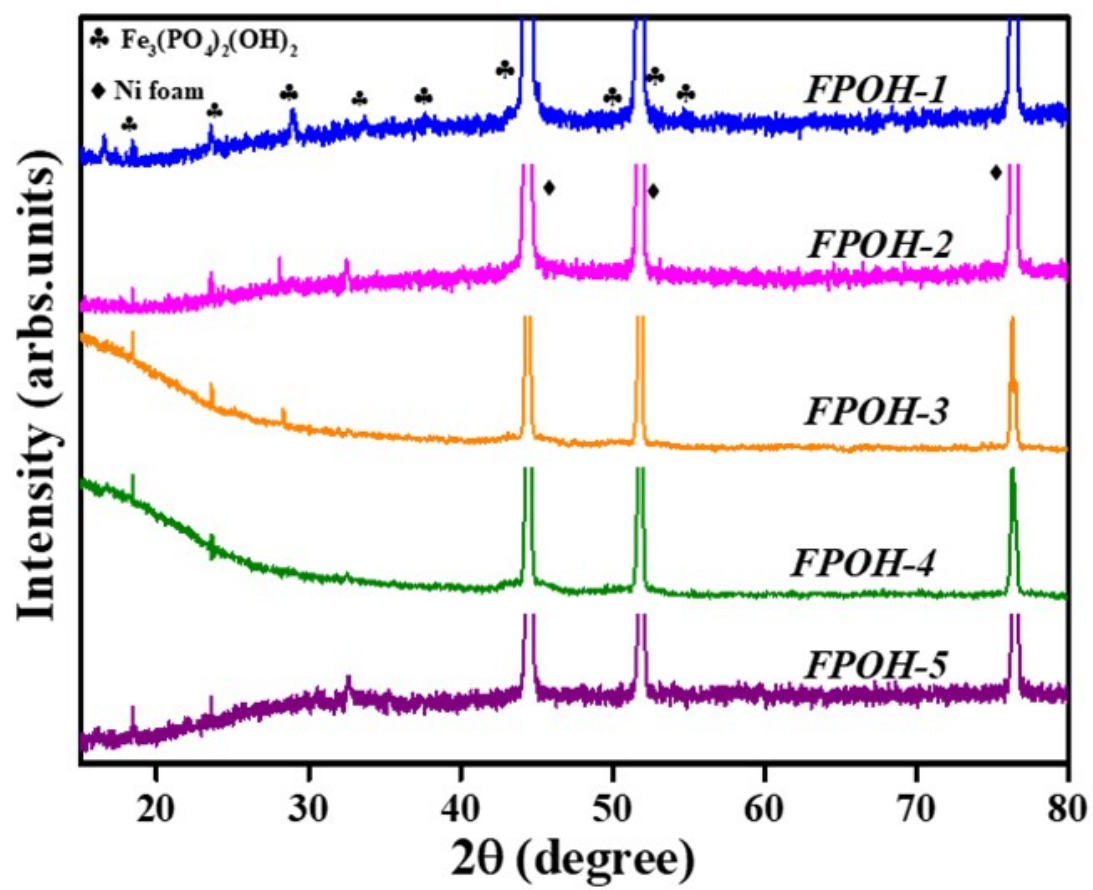

**Fig. S1:** XRD patterns of as-prepared  $\text{Fe}_3(\text{PO}_4)(\text{OH})_6 \cdot 3\text{H}_2\text{O}$

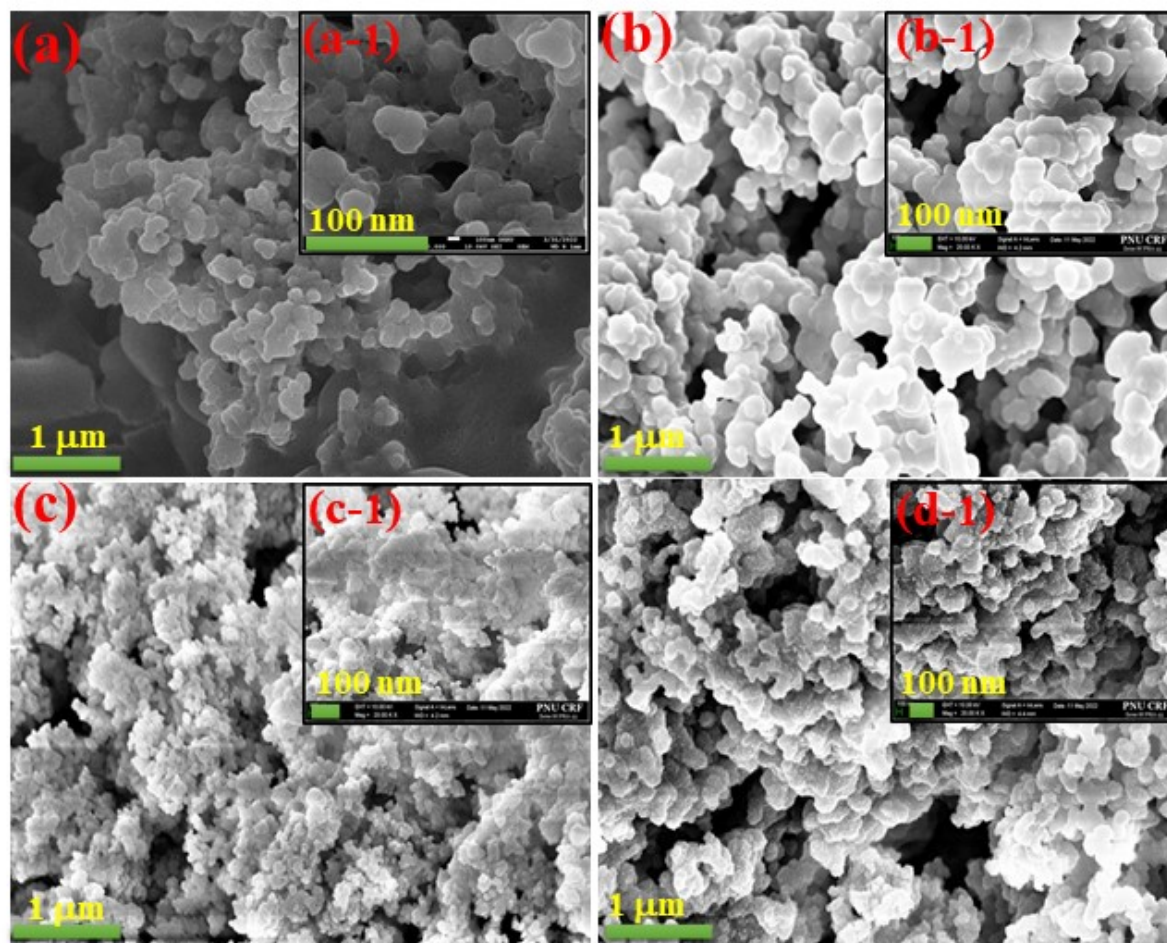

**Fig. S2:** FE-SEM images of  $\text{Fe}_3(\text{PO}_4)(\text{OH})_6 \cdot 3\text{H}_2\text{O}$  (a) FPOH-1, (b) FPOH-3, (c) FPOH- 4, (d)FPOH-5.

### FPOH-1

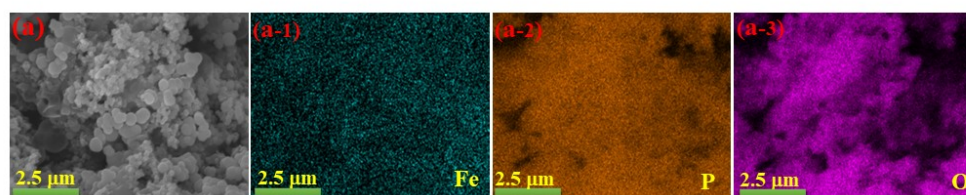

### FPOH-2

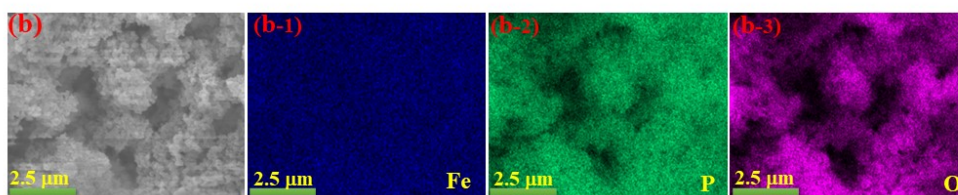

### FPOH-3

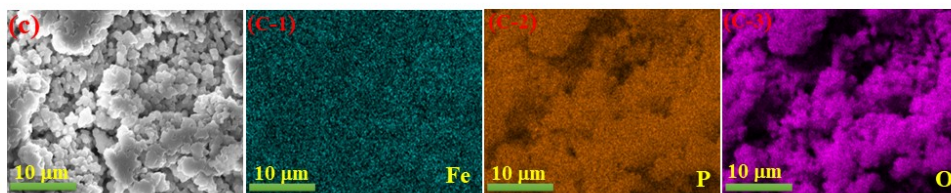

### FPOH-4

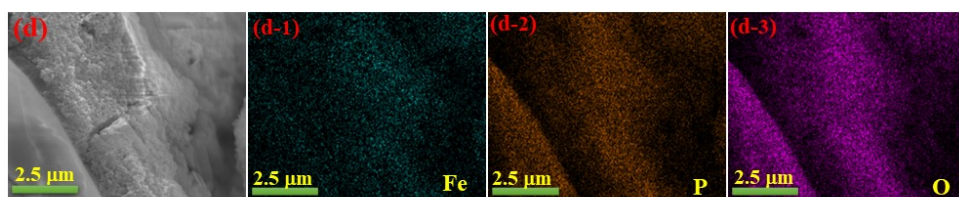

### FPOH-5

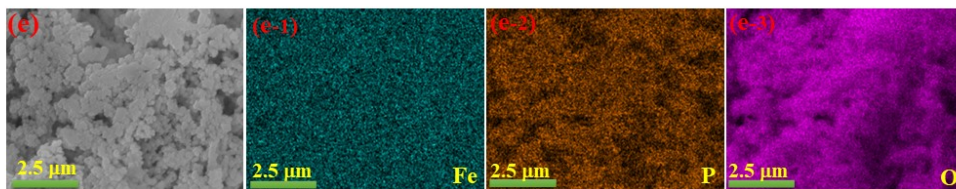

Figure S3: EDAX of the respective samples



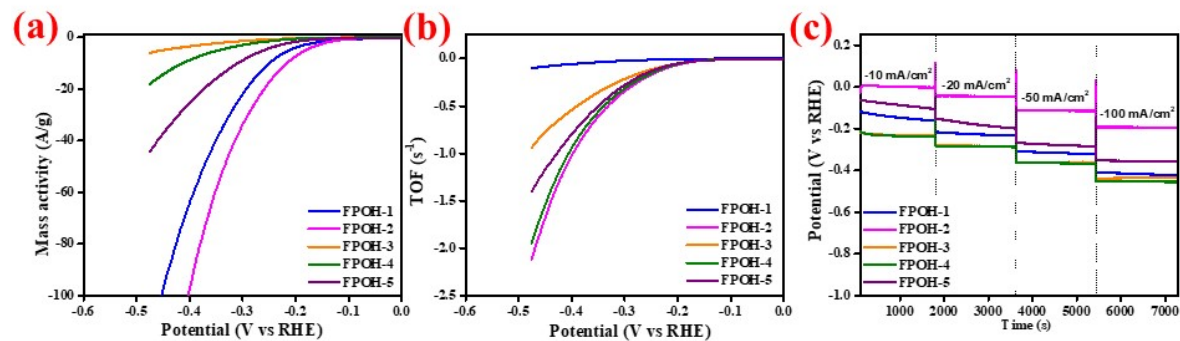

**Figure S4:** (a) The mass activity, (b) TOF graphs of Iron phosphate hydroxide hydrate, (c) Chronopotentiometry test at different current densities

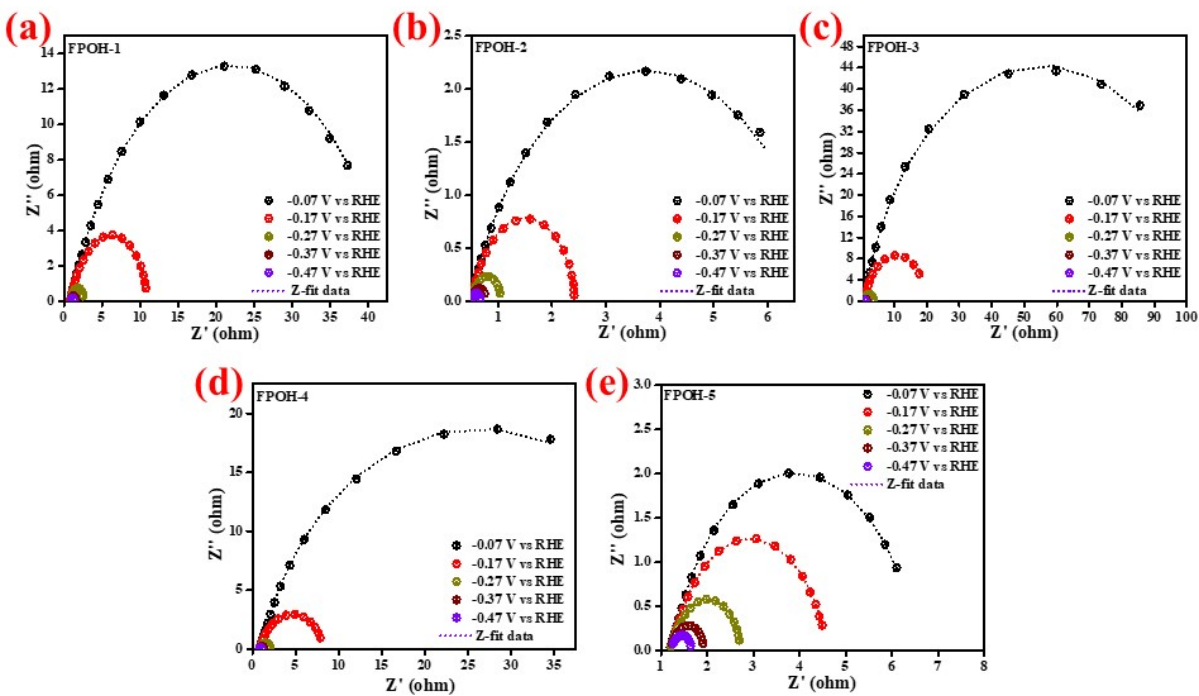

**Figure S5:** Nyquist plots of samples at different potentials



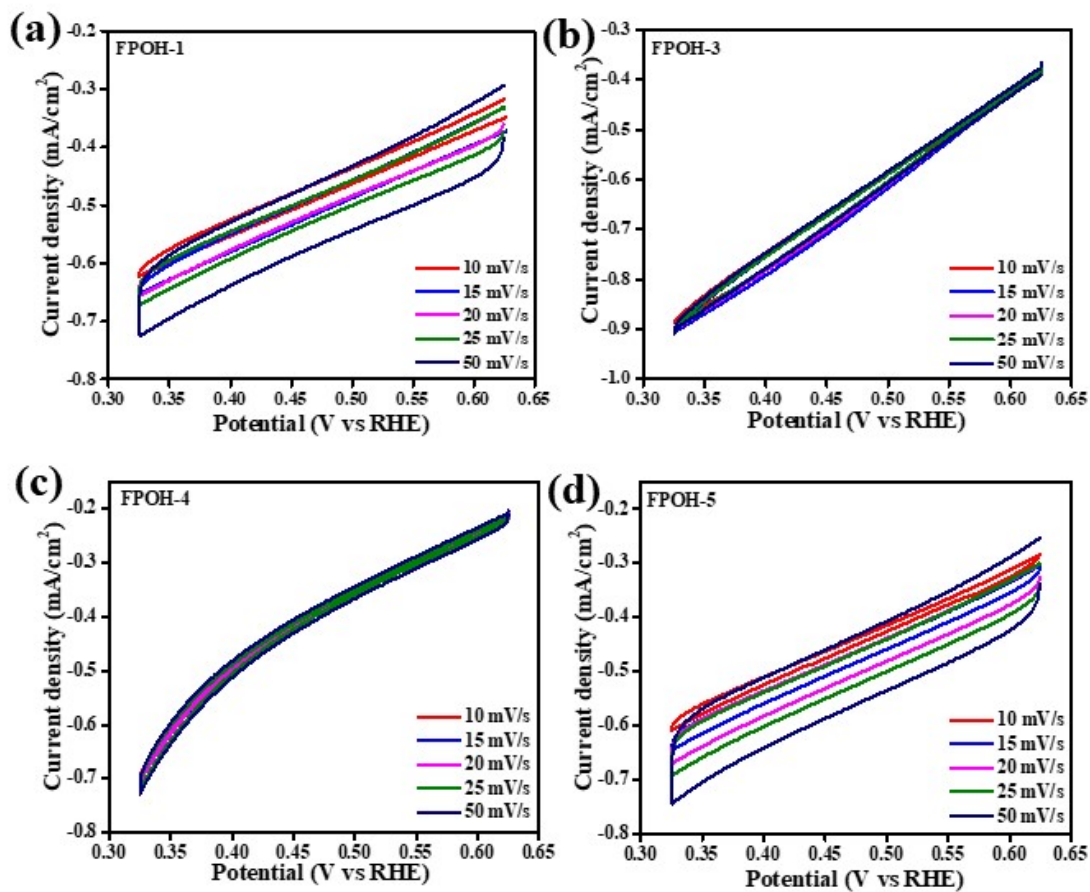

**Figure S6:** CV curves in non-faradic potential range for the estimation of  $C_{dl}$

**Table S2:** Electrochemical active surface area values.

| Samples | $C_{dl}$<br>(mF/cm <sup>2</sup> ) | $C_s$<br>(F/g) | $ECSA = \frac{C_{dl}}{C_s}$<br>(mg/cm <sup>2</sup> ) |
|---------|-----------------------------------|----------------|------------------------------------------------------|
| FPOH-1  | 1.3                               | 0.832          | 1.59                                                 |
| FPOH-2  | 425                               | 0.48           | 885.2                                                |
| FPOH-3  | 1.7                               | 0.182          | 19.0                                                 |
| FPOH-4  | 0.29                              | 0.43           | 0.337                                                |
| FPOH-5  | 3.2                               | 1.41           | 1.42                                                 |

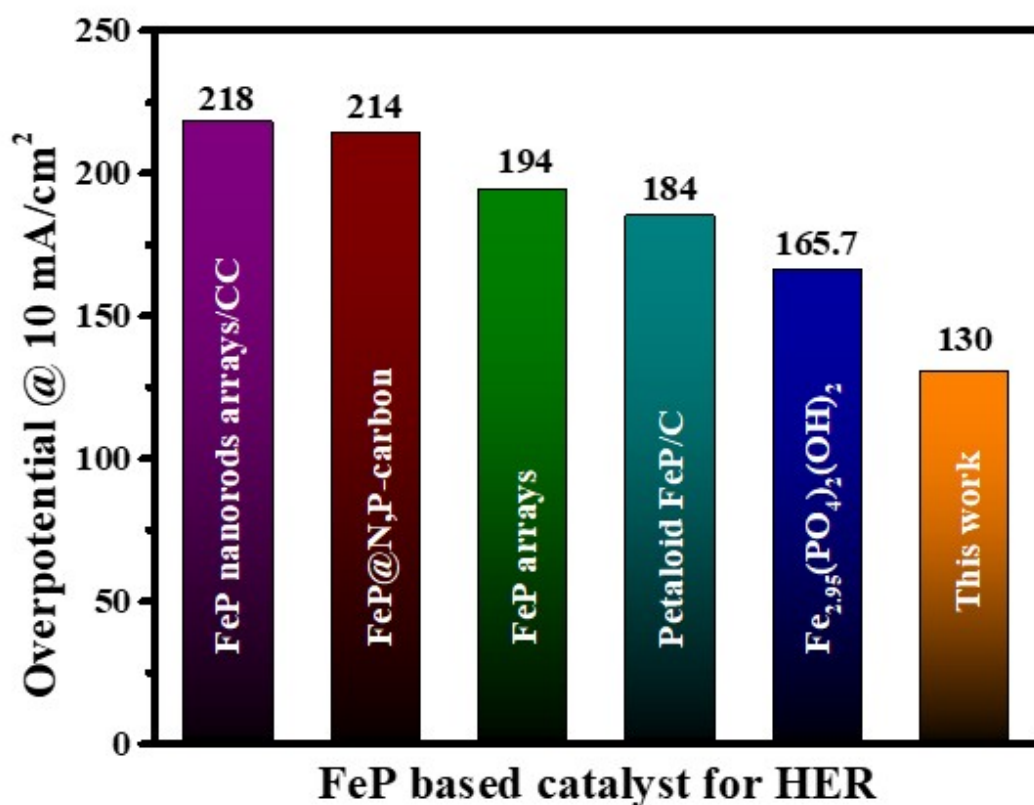

**Figure S7:** Comparison of Iron phosphate based catalyst for Hydrogen evolution reaction.<sup>1–5</sup>

- 1 Y. Liang, Q. Liu, A. M. Asiri, X. Sun and Y. Luo, *ACS Catal.*, 2014, **4**, 4065–4069.
- 2 Z. Pu, I. S. Amiinu, C. Zhang, M. Wang, Z. Kou and S. Mu, *Nanoscale*, 2017, **9**, 3555–3560.
- 3 C. Y. Son, I. H. Kwak, Y. R. Lim and J. Park, *Chem. Commun.*, 2016, **52**, 2819–2822.
- 4 F. Wang, X. Yang, B. Dong, X. Yu, H. Xue and L. Feng, *Electrochem. commun.*, 2018, **92**, 33–38.
- 5 S. A. Khalate, S. A. Kadam, Y. R. Ma, S. S. Pujari, S. J. Marje, P. K. Katkar, A. C. Lokhande and U. M. Patil, *Electrochim. Acta*, 2019, **319**, 118–128.
